# Supplementary material
Source: PubMed Central journal article supplement (PMC2860250)
Supplement: supp_137.10.1679_DEV050088TableS1.pdf [file supp_137.10.1679_DEV050088TableS1.pdf]

**Table S1. List of primers and restriction sites**

| No. | Sequence (5' to 3')                             | Forward restriction site | Reverse restriction site | Into plasmid                                       |
|-----|-------------------------------------------------|--------------------------|--------------------------|----------------------------------------------------|
| 1   | GCCCAATTGATGTCAGACACTAAATCCGA                   | <i>MfeI</i>              |                          | pHSP83(5'-3'UTRs) (cut with <i>EcoRI</i> )         |
| 2   | GATGGATCCTTAGCTTCTGCCGCCCTTTA                   |                          | <i>BamHI</i>             | pHSP83(5'-3'UTRs)                                  |
| 3   | GAC <u>ACTAGTT</u> CAGACACTAAATCCGAAATT         | <i>SpeI</i>              |                          | pET41a(+)                                          |
| 4   | TTT <u>CCATGGT</u> TAGCTTCTGCCGCCCTTTAGCC       |                          | <i>NcoI</i>              | pET41a(+)                                          |
| 5   | CACCATGTCAGACACTAAATCCGA                        |                          |                          | pET101/D-TOPO                                      |
| 6   | GCTTCTGCCGCCCTTTAGCC                            |                          |                          | pET101/D-TOPO                                      |
| 7   | CAG <u>TCGAC</u> ATGGGTGAAGCTCAAAAACCTTAAT      | <i>SaII</i>              |                          | Casper4-DJ (cut with <i>XhoI</i> )                 |
| 8   | CAGGAT <u>CCC</u> CTCCGCCTCCCGGCATCGTCTTTAAGGCT |                          | <i>BamHI</i>             | Casper4-DJ                                         |
| 9   | CAGGAT <u>CCT</u> CAGACACTAAATCCGAAAT           | <i>BamHI</i>             |                          | Casper4-PrA-DJ                                     |
| 10  | CAGCGG <u>CCGCT</u> TAGCTTCTGCCGCCCTTTA         |                          | <i>NotI</i>              | Casper4-PrA-DJ                                     |
| 11  | CAGCGGCCGCTTACATTAGTTGCTGCGATC                  |                          |                          | Casper4-PrA-DJ                                     |
| 12  | GTGCCACAGCTTATCAACGA                            |                          |                          | Sequencing from <i>nutcracker</i> 5' UTR           |
| 13  | CCCGAGAATCTTTATGCACC                            |                          |                          | Sequencing from <i>nutcracker</i> 3' UTR           |
| 14  | CCGAAATCCGCACATAGCAGGT                          |                          |                          | Sequencing from <i>nutcracker</i> mid-gene forward |
| 15  | GGCACCCATTCCAGAGTAGC                            |                          |                          | Sequencing from <i>nutcracker</i> mid-gene reverse |
